# Supplementary material for: A missing source of aerosols in Antarctica – beyond long-range transport, phytoplankton, and photochemistry
Source: Copernicus journal article supplement (doi:10.5194/acp-2016-606), 2016-07-14
Supplement: Supplementary file 1 [file acp-2016-606-supplement.pdf]

## Supplemental Information

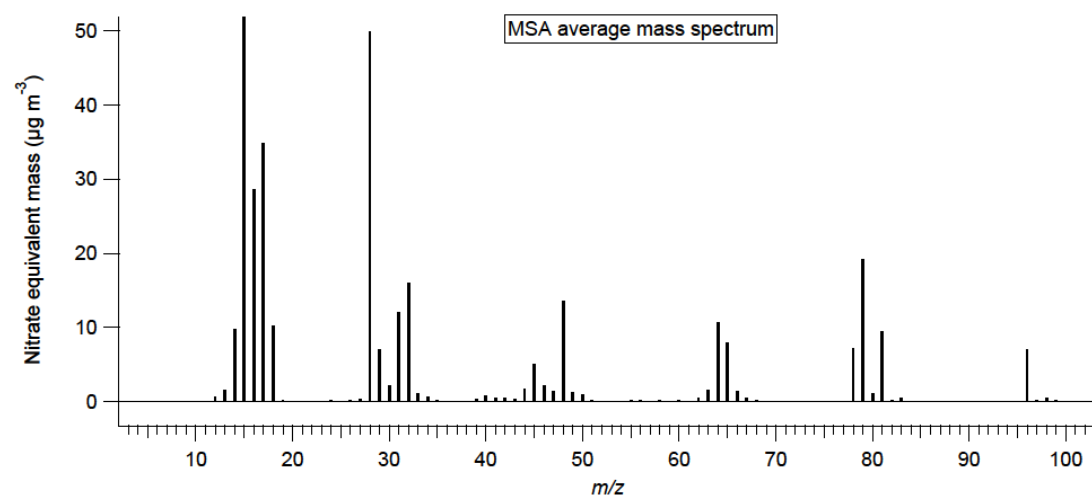

Figure S1: MSA Mass Spectrum at 600°C from atomizing pure methylsulfonic acid (>99.0%, Sigma Aldrich).
